# Supplementary material for: CT-based radiomic prognostic vector (RPV) predicts survival and stromal histology in high-grade serous ovarian cancer: an external validation study
Source: Springer Nature journal article supplement (doi:10.1007/s00330-024-11267-5), 2024-12-11

## Supplementary Material

**Supplementary Table S1:** Summary of descriptive characteristics of the MUW external validation cohort

CR – complete response, PR – partial response, SD – stable disease, PD – progressive disease, PARPi – poly (ADP-ribose) polymerase inhibitor, MUW –Medical University of Vienna validation cohort, CT – computer tomography, FIGO – International Federation of Gynaecology and Obstetrics, rt – right side, lt – left side.

| Characteristics                    |                | N   |           |
|------------------------------------|----------------|-----|-----------|
| <b>Vendor of CT</b>                | Siemens        | 158 | (79.80 %) |
|                                    | Philips        | 30  | (15.15 %) |
|                                    | Toshiba        | 9   | (4.55 %)  |
|                                    | GE             | 1   | (0.51 %)  |
| <b>Post-OP residual disease</b>    | CGR            | 98  | (49.49 %) |
|                                    | Non-CGR, < 2cm | 41  | (20.71 %) |
|                                    | Non-CGR, >2cm  | 38  | (19.19 %) |
|                                    | Unknown        | 21  | (10.61 %) |
| <b>FIGO stage</b>                  | 1B             | 1   | (0.51 %)  |
|                                    | 1C             | 5   | (2.53 %)  |
|                                    | 2A             | 1   | (0.51%)   |
|                                    | 2B             | 7   | (3.54 %)  |
|                                    | 2C             | 5   | (2.53 %)  |
|                                    | 3A             | 9   | (4.55 %)  |
|                                    | 3B             | 15  | (7.58 %)  |
|                                    | 3C             | 132 | (66.67 %) |
|                                    | 4A             | 5   | ((2.53 %) |
|                                    | 4B             | 18  | (9.09 %)  |
| <b>Grade</b>                       | 1              | 2   | (1.01 %)  |
|                                    | 2              | 2   | (1.01 %)  |
|                                    | 3              | 194 | (97.98%)  |
| <b>Chemotherapy</b>                | Yes            | 181 | (91.41 %) |
|                                    | No             | 17  | (8.59 %)  |
| <b>Platinum-based chemotherapy</b> | Yes            | 181 | (91.41 %) |
|                                    | No             | 2   | (1.01 %)  |
|                                    | Unknown        | 15  | (7.58 %)  |
| <b>Response to treatment</b>       | CR             | 145 | (73.23 %) |
|                                    | PR             | 23  | (11.62 %) |
|                                    | SD             | 1   | (0.51 %)  |
|                                    | PD             | 13  | (6.57 %)  |
|                                    | Unknown        | 16  | (8.08 %)  |
| <b>Relapse disease</b>             | Yes            | 127 | (64.14 %) |
|                                    | No             | 71  | (35.86 %) |
| <b>Therapy after relapse</b>       | Chemotherapy   | 92  | (72.44 %) |

|                                                        |                               |                     |           |
|--------------------------------------------------------|-------------------------------|---------------------|-----------|
|                                                        | Hemotherapy + PARPi           | 10                  | (7.87 %)  |
|                                                        | Surgery + Chemotherapy        | 10                  | (7.87 %)  |
|                                                        | Irradiation                   | 2                   | (1.57 %)  |
|                                                        | Missing                       | 85                  | (66.93 %) |
| <b>RPV output (per lesion, n=244)</b>                  | Low                           | 185 (rt 157; lt 28) | (75.82 %) |
|                                                        | Medium                        | 50 (rt 36; lt 14)   | (20.49 %) |
|                                                        | High                          | 9 (rt 5; lt 4)      | (3.69 %)  |
| <b>RPV output in bilateral lesions (n=46 patients)</b> | Bilateral low (per lesion)    | 57 (rt 29; lt 28)   | (61.96%)  |
|                                                        | Bilateral medium (per lesion) | 29 (rt 15; lt 14)   | (31.52%)  |
|                                                        | Bilateral high (per lesion)   | 6 (rt 2; lt 4)      | (6.52%)   |
|                                                        | Bilateral low (per RPV)       | 19                  | (41.30%)  |
|                                                        | Bilateral medium (per RPV)    | 6                   | (13.04%)  |
|                                                        | Bilateral high (per RPV)      | -                   | -         |

Supplementary Table S2: Steps undertaken for the radiomic analysis.

|   |                                                                                                                                                                                                                                                                                                                                                      |
|---|------------------------------------------------------------------------------------------------------------------------------------------------------------------------------------------------------------------------------------------------------------------------------------------------------------------------------------------------------|
| 1 | We used the IBSI CT phantom. There are no reference values on the IBSI website, (from <a href="http://theibsi.github.io/ibsi1/">http://theibsi.github.io/ibsi1/</a> ) based on the CT phantom                                                                                                                                                        |
| 2 | We therefore used Pyradiomics as this is an IBSI compliant radiomic tool. This produced 112 features that could be used for the analysis                                                                                                                                                                                                             |
| 3 | TexLAB v2 produced 666 features using one grey level, but by selecting all grey levels, there were 3906 features                                                                                                                                                                                                                                     |
| 4 | 42 features were identical in name and output. 4 features were identical in name and within 6% absolute difference                                                                                                                                                                                                                                   |
| 5 | The following is true of features that make up the RPV vector: <ul style="list-style-type: none"> <li>- FOS_Imedian (exact match with pyradiomics)</li> <li>- NGTDM_Contra_25HUgl (within 2% difference)</li> <li>- GLRLM_SRLGLE_25HUgl (exact match with pyradiomics)</li> <li>- FD_max_25HUgl (feature is not supported by pyradiomics)</li> </ul> |

**Supplementary Figure S1:** Kaplan-Meier analysis of patient survival comparing MUW cohort with HH cohort. Progression-free survival (a) and overall survival (b). The progression-free survival at MUW showed a trend suggesting shorter PFS, but this was not statistically significant. OS was equivalent in the two cohorts.

OS – overall survival, PFS – progression free survival, MUW – Medical University of Vienna external validation cohort, HH – Hammersmith Hospital, London cohort.

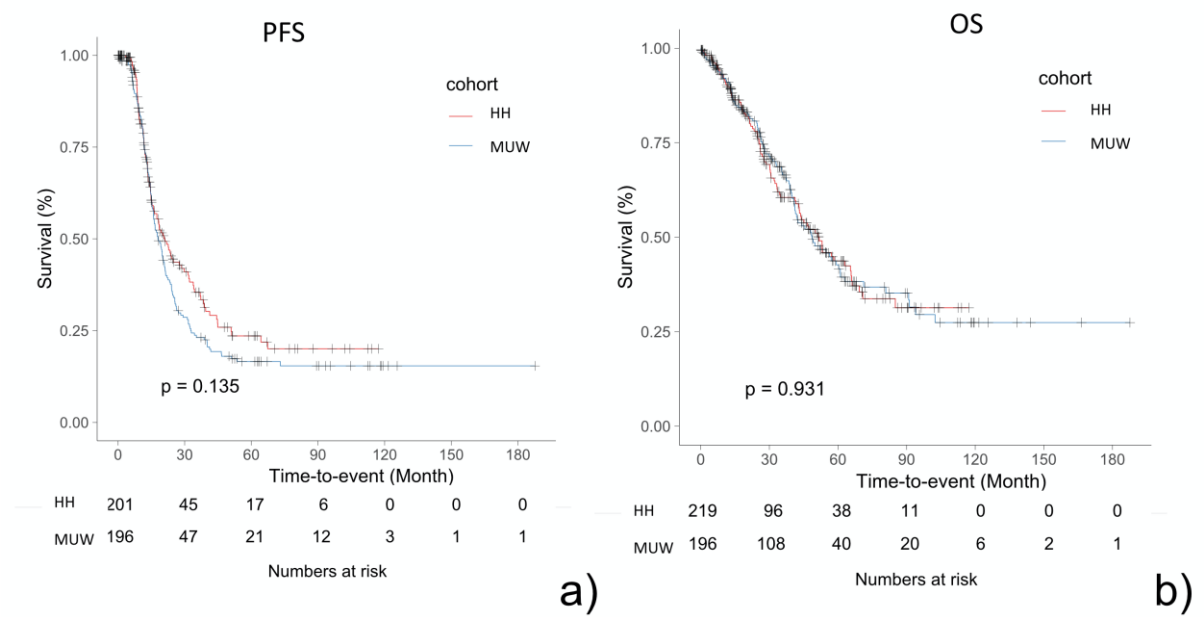

**Supplementary Figure S2:** Boxplots illustrating the subgroup analysis of stromal content of the nine RPV-high and RPV-low lesions. For RPV-low lesions subgroups with the nine lowest calculated RPV values (RPV-lowest), and three groups (group 1-3) with a random selection of nine RPV-low calculated cases were analysed, respectively. The graph depicts the positive correlation of RPV-high with the stromal marker, fibronectin, in each subcategory. P-value = 5.869e-05 by Kruskal Wallis test.

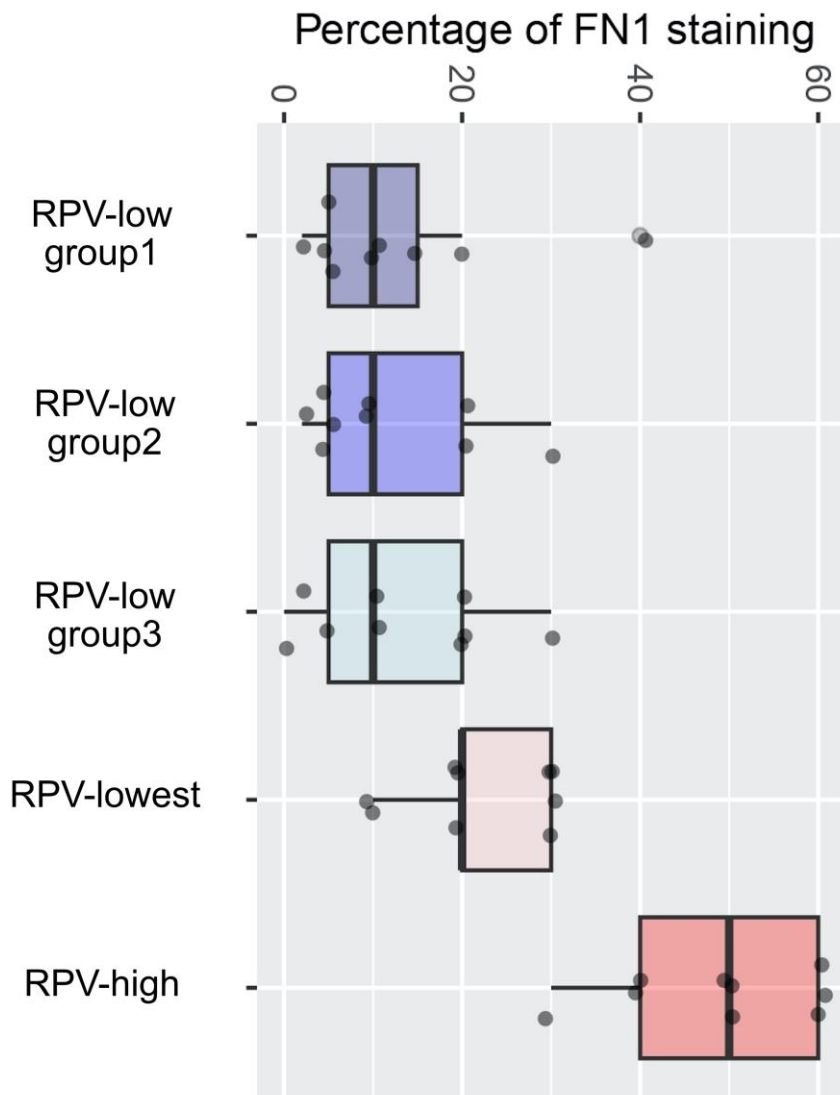

Supplement: MOESM1 [file 330_2024_11267_MOESM1_ESM.pdf]
